# Supplementary material for: Synergistic dual-pH responsive copolymer micelles for pH-dependent drug release
Source: Royal Society of Chemistry journal article supplement (doi:10.1039/c5nr06745f), 2015-12-03
Supplement: c5nr06745f1.pdf [file c5nr06745f1.pdf]

## Supplementary Information

### **Synergistic Dual-pH Responsive Copolymer Micelles for Impediment of Premature Drug Release in Blood and Motivation of the Intracellular Delivery Efficiency**

Hongzhang Deng<sup>1,3</sup>, Xuefei Zhao<sup>1,3</sup>, Jinjian Liu<sup>2</sup>, Jianhua Zhang<sup>1</sup>, Liandong Deng<sup>1</sup>, Jianfeng Liu<sup>2\*</sup>, Anjie Dong<sup>1,3\*</sup>

<sup>1</sup>Department of Polymer Science and Technology and Key Laboratory of Systems Bioengineering of the Ministry of Education, School of Chemical Engineering and Technology, Tianjin University, Tianjin 300072, China

<sup>2</sup>Tianjin Key Laboratory of Radiation Medicine and Molecular Nuclear Medicine, Institute of Radiation Medicine, Chinese Academy of Medical Science and Peking Union Medical College, Tianjin, 300192, China

<sup>3</sup>Collaborative Innovation Center of Chemical Science and Engineering (Tianjin), Tianjin 300072, China

\* Corresponding author. Fax: +86 22 27890707.

\*\* Corresponding author. Fax: +86 22 85683019.

E-mail addresses: [ajdong@tju.edu.cn](mailto:ajdong@tju.edu.cn) (A. Dong), [lewis78@163.com](mailto:lewis78@163.com) (J. Liu).

Synthesis of mPEG-b-P(CL-co-BMPCL).

The mPEG-P(CL-co-BMPCL) was synthesized by ring-opening polymerization (ROP) of  $\epsilon$ -caprolactone and BMPCL in the presence of mPEG as an initiator and Sn(Oct)<sub>2</sub> as a catalyst according to our previous report[1]. Briefly, mPEG (1.0 g, 0.2 mmol) was dissolved in 3 mL toluene. Then  $\epsilon$ -caprolactone (1.53 g, 13.4 mmol), BMPCL (0.167 g, 0.6 mmol) and stannous octoate were added to the reaction mixture under dry nitrogen and sealed. The system was stirred at 130 °C for 12 h and then precipitated with excess diethyl. The resulting white solid was purified by precipitating with diethyl ether for three times. The mPEG-P(CL-co-BMPCL) product was dried in vacuum for 24 h at room temperature

Synthesis of (2,2-dimethyl-1,3-dioxolane-4-yl) methyl acrylate (DDMA).

The preparation of DA was carried out by the reaction of 1,2-isopropylidenglycerol (8.4 g, 65 mmol), methacryloylchloride (8.2 g, 90 mmol) and triethylamine (9.1 g, 90 mmol) in anhydrous CH<sub>2</sub>Cl<sub>2</sub> (50 mL) in an ice bath for 15 h. The reaction solution was filtered and sequentially washed with 0.1 N HCl, 0.1 N NaOH and distilled water. The filtrate was concentrated by rotary evaporation. The product was purified by silica gel chromatography[2]. <sup>1</sup>H-NMR characterization of DDMA was shown in Figure. S1.

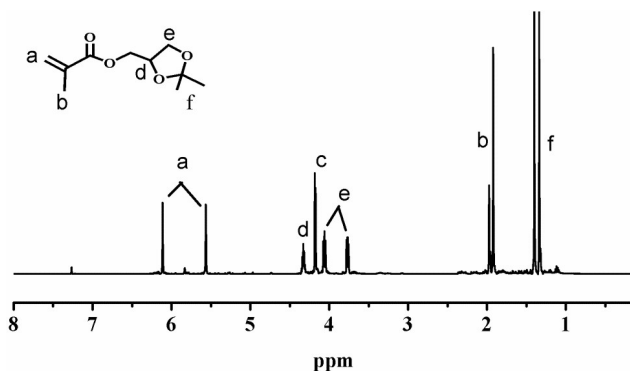

Fig. S1. <sup>1</sup>H-NMR characterization of DDMA

Table S1. Stability of blank and DOX-loaded mPEG-ros-P(CL-co-DCL) NPs

| Copolymers                                                   | Blank NPs              |                  |                        |                  | DOX-loaded NPs         |                  |                        |                  |
|--------------------------------------------------------------|------------------------|------------------|------------------------|------------------|------------------------|------------------|------------------------|------------------|
|                                                              | Size (nm) <sup>a</sup> | PDI <sup>a</sup> | Size (nm) <sup>b</sup> | PDI <sup>b</sup> | Size (nm) <sup>a</sup> | PDI <sup>a</sup> | Size (nm) <sup>b</sup> | PDI <sup>b</sup> |
| mPEG-b-(PCL-g-PDA <sub>30</sub> )                            | 93 ± 4                 | 0.10             | 100 ± 5                | 0.13             | 125 ± 4                | 0.12             | 122 ± 5                | 0.12             |
| mPEG-b-(PCL-g-P(DA <sub>30</sub> -co-DMAEMA <sub>10</sub> )) | 105 ± 6                | 0.11             | 110 ± 6                | 0.12             | 116 ± 4                | 0.11             | 110 ± 6                | 0.13             |
| mPEG-b-(PCL-g-P(DA <sub>30</sub> -co-DMAEMA <sub>15</sub> )) | 128 ± 4                | 0.13             | 127 ± 7                | 0.12             | 127 ± 3                | 0.12             | 126 ± 4                | 0.12             |
| mPEG-b-(PCL-g-P(DA <sub>30</sub> -co-DMAEMA <sub>20</sub> )) | 140 ± 3                | 0.12             | 142 ± 5                | 0.11             | 135 ± 6                | 0.11             | 146 ± 6                | 0.11             |

<sup>a</sup>Determined using Laser particle size analyzer at 25°C in PBS (10 mM, pH 7.4).

<sup>b</sup> Determined using Laser particle size analyzer at 25°C in PBS (10 mM, pH 7.4) containing 10% (v/v) FBS .

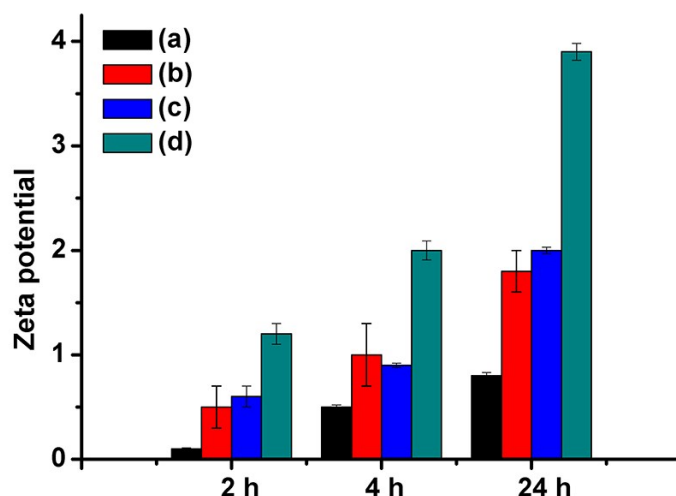

Fig. S2. The zeta potential of the freeze-dried micelles dispersed in H<sub>2</sub>O at pH 5.0. mPEG-b-(PCL-g-PDA<sub>30</sub>) (a), mPEG-b-(PCL-g-P(DA<sub>30</sub>-co-DMAEMA<sub>10</sub>)) (b), mPEG-b-(PCL-g-P(DA<sub>30</sub>-co-DMAEMA<sub>15</sub>)) (c) and mPEG-b-(PCL-g-P(DA<sub>30</sub>-co-DMAEMA<sub>20</sub>)) (d)

Table S1 Physiochemical characteristics of mPEG-b-(PCL-g-P(DA-co-DMAEMA)) micelles with FRET probes (DiO and DiI).

| Copolymers                                                   | Loading content (% w/w) |      | Diameters <sup>a</sup> | PDI <sup>a</sup> |
|--------------------------------------------------------------|-------------------------|------|------------------------|------------------|
|                                                              | DiO                     | DiI  |                        |                  |
| mPEG-b-(PCL-g-PDA <sub>30</sub> )                            | 0.60                    | 0.61 | 101 ± 3                | 0.118            |
| mPEG-b-(PCL-g-P(DA <sub>30</sub> -co-DMAEMA <sub>10</sub> )) | 0.63                    | 0.62 | 125 ± 5                | 0.126            |
| mPEG-b-(PCL-g-P(DA <sub>30</sub> -co-DMAEMA <sub>15</sub> )) | 0.66                    | 0.65 | 132 ± 7                | 0.121            |
| mPEG-b-(PCL-g-P(DA <sub>30</sub> -co-DMAEMA <sub>20</sub> )) | 0.74                    | 0.73 | 140 ± 6                | 0.122            |

<sup>a</sup>Loading content of payloads were measured using UV absorbance

<sup>b</sup>Mean diameter and polydispersity were determined by DLS

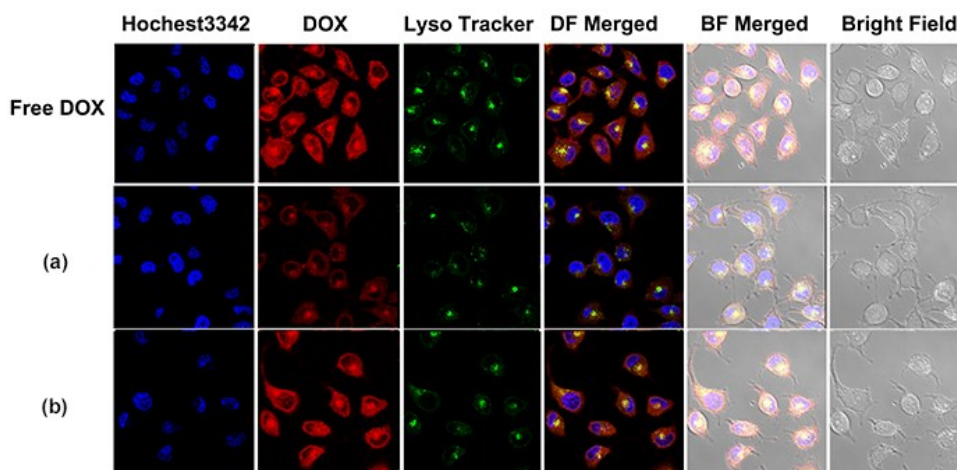

Fig. S3 Representative Fluorescence microscopy images of MCF-7 cells incubated with DOX-loaded

mPEG-b-(PCL-g-PDA<sub>30</sub>) (a) and mPEG-b-(PCL-g-P(DA<sub>30</sub>-co-DMAEMA<sub>20</sub>)) (d) micelles and free DOX (10 µg/mL) for 12 h (scale bars, 25mm).

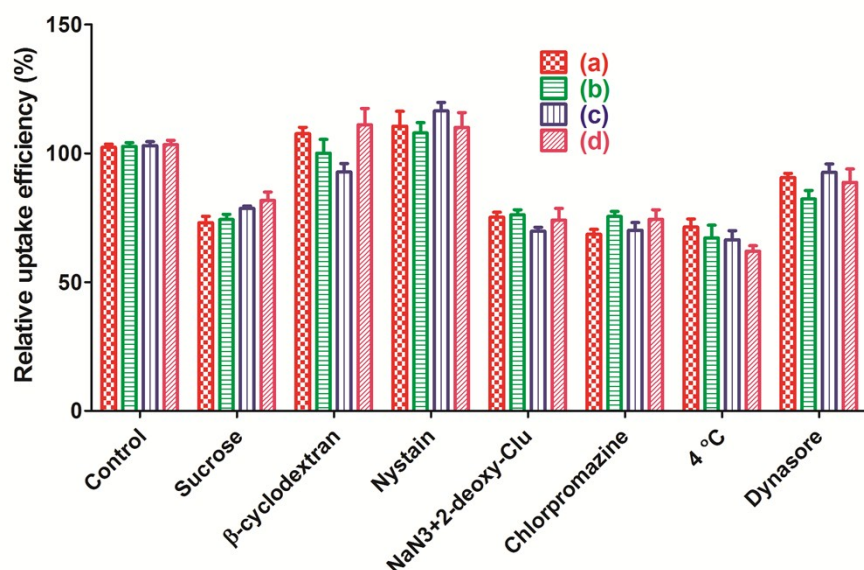

Fig. S4. Endocytosis inhibition of DOX-loaded mPEG-b-(PCL-g-PDA<sub>30</sub>) (a), mPEG-b-(PCL-g-P(DA<sub>30</sub>-co-DMAEMA<sub>10</sub>)) (b), mPEG-b-(PCL-g-P(DA<sub>30</sub>-co-DMAEMA<sub>15</sub>)) (c), and mPEG-b-(PCL-g-P(DA<sub>30</sub>-co-DMAEMA<sub>20</sub>)) (d) micelles in MCF-7 cells using various endocytosis inhibitors.

### Reference

- [1] Deng H, Zhang Y, Wang X, Cao Y, Liu J, Liu J, et al. Balancing the stability and drug release of polymer micelles by the coordination of dual-sensitive cleavable bonds in cross-linked core. *Acta biomaterialia*. 2015;11:126-36.
- [2] Zhang D, Zhang H, Nie J, Yang J. Synthesis and self - assembly behavior of pH - responsive amphiphilic copolymers containing ketal functional groups. *Polymer International*. 2010;59:967-74.
